# Supplementary material
Source: PubMed Central journal article supplement (PMC2901633)
Supplement: ebo-2010-091-supp.pdf [file ebo-2010-091-supp.pdf]

## SUPPLEMENTARY MATERIAL

### Materials and Methods

*Viruses.* EHV P1553, PH235 and K22005 were isolated as described (Lindsay et al., 1993, *Am J Trop Med Hyg*, 49:686-696). EHV V366 was supplied by R. Weir (Berrimah Agricultural Research Centre, Berrimah, NT), and SW42148 by Dr. M. Lindsay (University of Western Australia). Isolate 19542 is of unknown origin - the earliest recorded date is 1976, and is thought to be an early Queensland or New South Wales strain. The New South Wales isolates have been previously reported (Russell et al., 1997, *Arbovirus Research in Australia*, 7:228-234). EHV stocks were propagated in PS-EK cells (Gorman et al., 1975, *Australian Journal of Medical Technology*, 6:65-71) and stored at  $-70^{\circ}\text{C}$  as clarified culture medium collected either when major CPE was occurring or at 6 days post infection. Other virus isolates grown for enzyme immunoassay were DENV-1 (Hawaii), DENV-2 (New Guinea C), DENV-3 (H87), DENV-4 (H241), Banzi virus (BAN; SAH 336), Sepik virus (SEPV; MK7148), Yellow Fever virus (YFV; 17D 204 vaccine), Murray Valley encephalitis (MVEV; F3/51), and Kokobera (KOKV; MRM32). These isolates were propagated as previously described (Broom et al., 1998, *Pathology*, 30:286-288).

*Cell culture.* PS-EK cells (Gorman et al., 1975, *Australian Journal of Medical Technology*, 6:65-71) were grown in HEPES-buffered 199 medium with 10% foetal bovine serum (FBS), 10mg/ml gentamycin and 100mg/ml penicillin and incubated at  $37^{\circ}\text{C}$  in a humidified atmosphere. *Aedes albopictus* C6/36 cells (Igarashi, 1978, *J Gen Virol*, 40:531-544) were grown in 199 medium with 10% FBS, 10mg/ml gentamycin and 100mg/ml penicillin at  $28^{\circ}\text{C}$  at 5%  $\text{CO}_2$  in a humidified atmosphere.

*Monoclonal antibodies.* Monoclonal antibodies to EHV PH235 virus were produced as previously described (Hall et al., 1990, *J Gen Virol*, 71:2923-2930). Briefly, mice were immunised with live EHV virus at 0 and 2 weeks by IP, and 8 week post injection by IV. Spleen cells were harvested 3 days later and fused using an adaption of the method of Galfre (Delmastro et al., 1997, *Vaccine*, 15:1276-1285). Positive hybridomas were selected by enzyme immunoassay. Hybridomas reactive to EHV were cloned at least twice by limiting dilution before antibody was produced as ascitic fluid. Monoclonal antibodies to EH C281 virus were a gift from Debbie Phillips (Queensland Health, Centre for public Health Sciences). DENV-2 specific antibodies were generated from mice that had been immunized IP and boosted IV with live dengue-2 virus strain PR159. DENV type-specific monoclonal antibodies 15F3, 3H5, 5D4 and 1H10 and DENV group-reactive monoclonal antibody 2H2 (Henchal et al., 1982, *Am J Trop Med Hyg*, 31:830-836) were obtained from the American Type Culture Collection (ATCC). Protein specificity of monoclonal antibodies was determined by Western blot analysis as previously described (Hall et al., 1990, *J Gen Virol*, 71:2923-2930; Falconar, 1999, *Arch Virol*, 144:2313-2330).

*Enzyme immunoassay.* Monoclonal antibody binding patterns of isolates were determined by inoculation of isolates onto confluent 96-well monolayers of C6/36 cells, incubation for up to 7 days, and subsequent assay by tissue culture enzyme immunoassay as described (Adams et al., 1995, *Virology*, 206:49-56; Broom et al., 1998, *Pathology*, 30:286-288; Johansen et al., 2007, *Virus Genes*, 35:147-154). Briefly, 250  $\mu\text{L}$  of virus stock was used to inoculate a monolayer of C6/36 cells in a 96 well plate. Upon observation of CPE, or at 7 days post infection, plates were fixed with 20% acetone and 0.2% bovine serum albumin in PBS. Non specific binding sites were blocked with TENTC (50 mM Tris, 1 mM EDTA, 0.15 mM NaCl, 0.05% Tween 20 and 0.2% Casien, pH 8) for 30 min at room temperature. Cross-reactivity with viral antigens was determined by addition of dilutions of antibodies (50  $\mu\text{L}$ /well) in TENTC from 1/2 for hybridoma supernatant and 1/500 for mouse ascities, and incubation at RT for 1 h. Plates were washed four times with PBS-T (0.05% Tween 20 in PBS, pH 7.5)

before addition of 50  $\mu$ L/well horseradish peroxidase (HRP)-conjugated anti-mouse IgG (BioRad) diluted 1/2000 in TENTC. Plates were incubated an additional 1 h at RT before being washed six times with PBS-T. Presence of conjugate was determined by the addition of 100  $\mu$ L ABTS (1mM 2,2' azino-bis[2-ethylbenzthiazoline-6-sulfonic acid] with 3mM H<sub>2</sub>O<sub>2</sub> in a citrate/phosphate buffer, pH 4.2) and measurement of the optical density at 405nm using a Muliskan® MCC/340 microplate reader (Labsystem). Plates of uninfected fixed C6/36 cells were used as controls. A monoclonal antibody was considered to bind specifically to an isolate if the absorbance at any dilution was greater than 0.25 and at least two-fold greater than the absorbance produced by the same antibody dilution on fixed control cells.

*Primers.* Amplification of a 1kb region of NS5 for each EHV isolate was performed using flavivirus universal primers FG1 and FG2 (Fulop et al., 1993, J Virol Meth, 44:179-188). Primers for internal sequencing of EHV were designed from the C281 sequence: FGA (5' TGA AAA TGT GAC TCA ACT AGC 3') was homologous to the C281 sequence approximately 380bp downstream from FG1; FGB (5' GKT GGT GGA GCG CGT GTG TCG 3') was complementary to the C281 sequence approximately 450bp downstream from FG1; FGY (5' CAG GTA CAG TAC AAG ACC 3') was homologous with the C281 sequence approximately 630bp downstream from FG1.

*RNA extraction, PCR and sequencing.* Viruses were amplified in 25 cm<sup>2</sup> tissue culture flasks using either PSEK or C6/36 cells. RNA was extracted using RNAzol B (Bresatec) and resuspended in 15  $\mu$ L of nuclease free water. PCR Products were amplified either by performing a one-tube reverse-transcription/PCR reaction directly from stored virus supernatant as described (Sellner et al., 1992, Journal of Virological Methods, 40:255-264), or by a two-step reverse-transcription PCR. Briefly, reverse transcription was performed by incubation of 1  $\mu$ L of extracted RNA and 35 ng of primer in a 10  $\mu$ L volume at 70 °C for 5 min followed by addition of 15  $\mu$ L RT reaction mixture (5  $\mu$ L 5x buffer, 1  $\mu$ L 25mM dNTPs and 5U AMV reverse transcriptase (Promega) and incubation at 42 °C for 1 h. PCR was performed on 2  $\mu$ L cDNA, 35 ng primer, 0.2 mM dNTPs, 2.5  $\mu$ L of 10x buffer and 2  $\mu$ L 25mM MgCl<sub>2</sub> with either Taq DNA polymerase (Promega) or Red Hot DNA polymerase (Applied Biosystems) in a final volume of 25  $\mu$ L, followed by thermocycling using a 480 Thermocycler (Perkin Elmer) at 94°C for 2minutes; 35 cycles of 94°C for 30 seconds, 42°C for 30 seconds, 72°C for 1 minute; and finally 7 minutes at 72°C. Sequencing was performed using the ABI PRISM™ Dye terminator cycle sequencing ready reaction kit (Perkin Elmer). Viral accession numbers used for phylogenetic analysis are listed in SM Table 1.

*Phylogenetic analysis.* Flaviviral sequences were downloaded from Genbank and translated to amino acid sequences. Amino acid sequences were aligned using Clustal W (Larkin et al., 2007, Bioinformatics, 23:2947-2948), and nucleotide sequences were aligned using the GeneDoc software package such that the translated amino acid sequence alignment was identical to the original amino acid alignment. Percentage sequence similarity for both DNA and protein alignments were determined from the ClustalW1.6 matrix and BLOSUM (Henikoff) matrices respectively in Clustal W. Phylogenetic analysis was performed with the PHYLIP analysis package (Felsenstein, 1989, Cladistics, 5:164-166): DNA distances were obtained from the Kimura 2-parameter algorithm and protein distances were obtained from the Dayhoff PAM matrix; phylogenetic relationships were determined with the neighbour-joining algorithm; and statistical significance of clusters calculated by bootstrapping 100 replicates and subsequent determination of consensus trees.

## Supplementary Figures and Tables:

SM Table 1. Accession numbers of viral sequences used in the phylogenetic analysis.

| Virus                            | Abbrev. | Strain              | Accession |
|----------------------------------|---------|---------------------|-----------|
| Edge Hill virus                  | EHV     | C281                | AF275876  |
|                                  |         | P1553               | AF275877  |
|                                  |         | GU0068              | HM136788  |
|                                  |         | PH235               | HM136789  |
|                                  |         | SW42148             | HM136790  |
|                                  |         | V366                | AF275874  |
|                                  |         | 19542               | HM136783  |
|                                  |         | 22144               | HM136784  |
|                                  |         | 22441               | HM136785  |
|                                  |         | 23562               | HM136786  |
|                                  | 26314   | AF275875            |           |
|                                  | 33029   | HM136787            |           |
| Banzi virus                      | BANV    | SAH 336             | L40951    |
| Yellow fever virus               | YFV     | 17D vaccine         | X03700    |
| Sepik virus                      | SEPV    | MK7148              | AY632543  |
| Jugra virus                      | JUGV    | P9-314              | EU303200  |
| Uganda S virus                   | UGSV    | 3/4/8, sept 1971    | EU303235  |
| Wesselsbron virus                | WESSV   | GEN 3 p18 12/9/74   | EU303237  |
| Entebbe bat virus                | ENTV    | UgIL-30             | AY632537  |
| Yokose virus                     | YOKV    | Oita 36             | AB114858  |
| Zika virus                       | ZIKV    | MR 766              | AY632535  |
| Dengue virus type 1              | DENV-1  | Nauru Island        | U88535    |
| Dengue virus type 2              | DENV-2  | Jamaica/N.1409      | M20558    |
| Dengue virus type 3              | DENV-3  | H87                 | M93130    |
| Dengue virus type 4              | DENV-4  | H241                | M14931    |
| Kunjin virus                     | KUNV    | MRM61C              | D00246    |
| West Nile Virus                  | WNV     | NY99-flamingo382-99 | AF196835  |
| Murray Valley encephalitis virus | MVEV    | 1-51                | NC_000943 |
| Alfuy virus                      | ALFV    | MRM3929             | AY898809  |
| Japanese encephalitis virus      | JEV     | JaOArS982           | M18370    |
| Usutu virus                      | USUV    | Vienna 2001         | NC_006551 |
| St Louis encephalitis virus      | SLEV    | Argentina 66        | AY632544  |
| Ilheus virus                     | ILHV    | Original            | AY632539  |
| Rocio virus                      | ROCV    | SPH 34675           | AY632542  |
| Bagaza virus                     | BAGV    | DakAr B209          | AY632545  |
| Iguape virus                     | IGUV    | SPAn 71686          | AY632538  |
| Bussuquara virus                 | BSQV    | BeAn 4073           | AY632536  |
| Kokohera virus                   | KOKV    | MRM 32              | AY632541  |

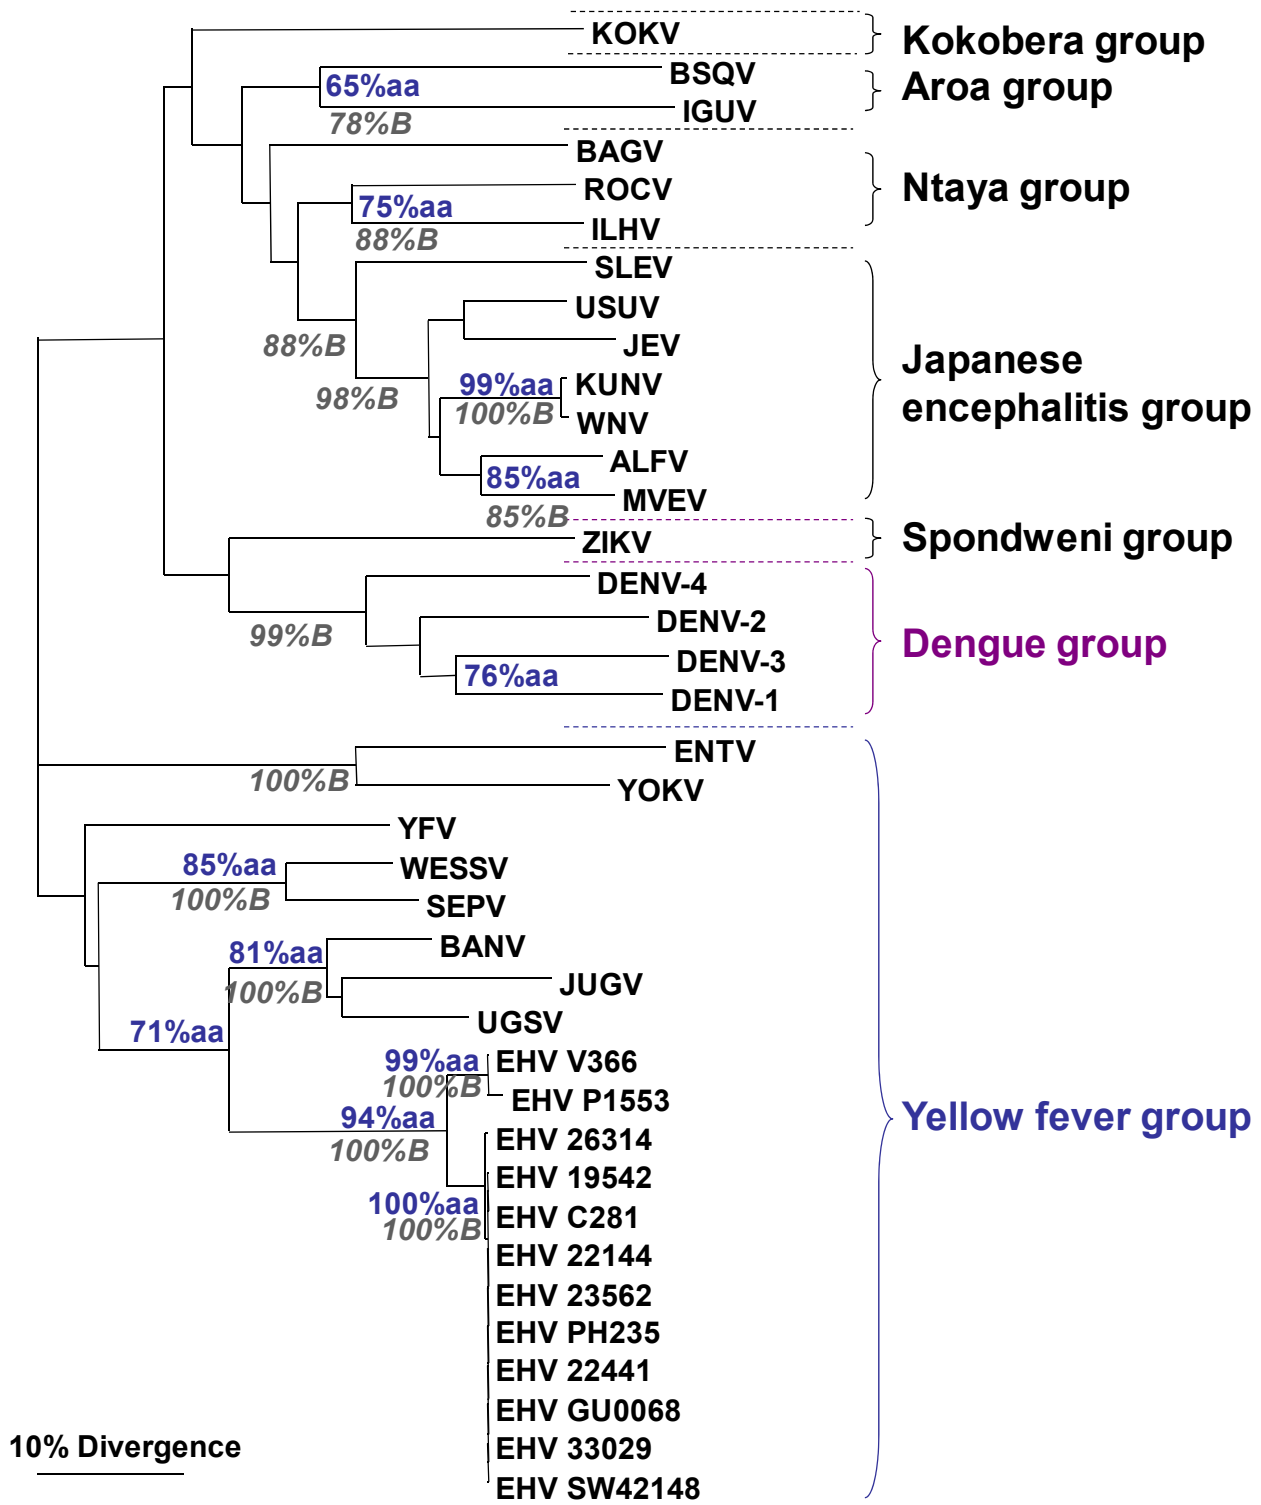

**SM Figure 1: Phylogenetic analysis of EHV amino acid sequences.** EHV and other mosquito-borne flavivirus amino acid sequences (220 amino acids) of the NS5 gene were aligned using ClustalW.(Larkin et al., 2007, Bioinformatics, 23:2947-2948) Phylogenetic analysis was performed with the PHYLIP analysis package(Felsenstein, 1989, Cladistics, 5:164-166) using the following parameters: Protein distances were obtained from the Dayhoff PAM matrix, phylogenetic relationships determined with the neighbour-joining algorithm, and statistical significance of clusters calculated by bootstrapping 100 replicates and subsequent determination of consensus trees. Bootstrap (B) values are shown in the grey italics, and percent amino acid similarity (aa) is shown in blue. Scale bar indicates the distance length of 10 percent divergence.

**SM Table 2: Percentage nucleotide similarity of EHV isolates compared to other flaviviruses.**

|            | JEV | USUV | KUNV | WNV | MVEV | ALFV | BAGV | ROCV | ILHV | BSQV | IGUV | KOKV | DEN2 | DEN1 | DEN3 | DEN4 | ZIKV | EHV P1553 | EHV V366 | EHV C281 | EHV PH235 | EHV 19542 | EHV 26314 | EHV 22441 | EHV 22144 | EHV 23562 | EHV SW | EHV 33029 | EHV GU0068 | JUGV | UGSV | BANV | YFV | SEPV | WESSV | YOKV | ENTV |     |
|------------|-----|------|------|-----|------|------|------|------|------|------|------|------|------|------|------|------|------|-----------|----------|----------|-----------|-----------|-----------|-----------|-----------|-----------|--------|-----------|------------|------|------|------|-----|------|-------|------|------|-----|
| SLEV       | 70% | 71%  | 72%  | 73% | 71%  | 68%  | 66%  | 67%  | 66%  | 66%  | 62%  | 62%  | 65%  | 63%  | 61%  | 62%  | 61%  | 60%       | 60%      | 58%      | 58%       | 58%       | 58%       | 58%       | 58%       | 58%       | 58%    | 58%       | 58%        | 59%  | 58%  | 60%  | 59% | 56%  | 59%   | 57%  | 56%  |     |
| JEV        |     | 75%  | 71%  | 70% | 72%  | 70%  | 68%  | 66%  | 66%  | 63%  | 61%  | 64%  | 63%  | 62%  | 61%  | 60%  | 62%  | 58%       | 58%      | 57%      | 57%       | 57%       | 57%       | 57%       | 57%       | 57%       | 57%    | 57%       | 57%        | 58%  | 60%  | 61%  | 59% | 58%  | 58%   | 57%  | 57%  |     |
| USUV       |     |      | 72%  | 73% | 74%  | 74%  | 65%  | 69%  | 66%  | 63%  | 64%  | 63%  | 62%  | 61%  | 61%  | 60%  | 62%  | 61%       | 61%      | 60%      | 60%       | 60%       | 60%       | 60%       | 60%       | 60%       | 59%    | 59%       | 60%        | 61%  | 60%  | 61%  | 59% | 58%  | 58%   | 57%  | 57%  |     |
| KUNV       |     |      |      | 89% | 73%  | 73%  | 64%  | 66%  | 67%  | 64%  | 61%  | 62%  | 61%  | 61%  | 59%  | 59%  | 61%  | 58%       | 59%      | 58%      | 58%       | 59%       | 58%       | 58%       | 58%       | 58%       | 58%    | 58%       | 58%        | 58%  | 58%  | 57%  | 59% | 57%  | 60%   | 56%  | 56%  |     |
| WNV        |     |      |      |     | 75%  | 72%  | 64%  | 68%  | 66%  | 63%  | 60%  | 62%  | 61%  | 61%  | 60%  | 58%  | 61%  | 59%       | 59%      | 58%      | 58%       | 58%       | 58%       | 58%       | 58%       | 58%       | 58%    | 58%       | 58%        | 59%  | 57%  | 56%  | 57% | 57%  | 58%   | 55%  | 57%  |     |
| MVEV       |     |      |      |     |      | 74%  | 64%  | 67%  | 66%  | 62%  | 61%  | 64%  | 61%  | 61%  | 59%  | 58%  | 61%  | 59%       | 59%      | 57%      | 58%       | 58%       | 58%       | 58%       | 58%       | 58%       | 58%    | 58%       | 58%        | 58%  | 57%  | 57%  | 58% | 57%  | 58%   | 59%  | 57%  |     |
| ALFV       |     |      |      |     |      |      | 64%  | 64%  | 66%  | 62%  | 60%  | 61%  | 60%  | 60%  | 58%  | 56%  | 61%  | 56%       | 56%      | 56%      | 56%       | 56%       | 56%       | 56%       | 56%       | 56%       | 56%    | 56%       | 56%        | 56%  | 59%  | 59%  | 56% | 56%  | 58%   | 57%  | 56%  |     |
| BAGV       |     |      |      |     |      |      |      | 68%  | 67%  | 63%  | 62%  | 60%  | 64%  | 62%  | 64%  | 63%  | 61%  | 58%       | 58%      | 58%      | 58%       | 58%       | 57%       | 58%       | 58%       | 58%       | 58%    | 58%       | 58%        | 59%  | 60%  | 58%  | 59% | 56%  | 57%   | 59%  | 58%  |     |
| ROCV       |     |      |      |     |      |      |      |      | 71%  | 65%  | 61%  | 64%  | 60%  | 59%  | 60%  | 59%  | 60%  | 59%       | 59%      | 59%      | 59%       | 59%       | 59%       | 59%       | 59%       | 59%       | 59%    | 59%       | 59%        | 59%  | 59%  | 60%  | 56% | 57%  | 57%   | 58%  | 56%  |     |
| ILHV       |     |      |      |     |      |      |      |      |      | 64%  | 58%  | 62%  | 59%  | 59%  | 59%  | 58%  | 61%  | 58%       | 58%      | 58%      | 58%       | 58%       | 58%       | 58%       | 58%       | 58%       | 58%    | 58%       | 58%        | 58%  | 58%  | 58%  | 55% | 57%  | 58%   | 57%  | 56%  |     |
| BSQV       |     |      |      |     |      |      |      |      |      |      | 65%  | 63%  | 62%  | 61%  | 61%  | 61%  | 61%  | 61%       | 58%      | 59%      | 59%       | 58%       | 58%       | 58%       | 58%       | 58%       | 58%    | 58%       | 58%        | 59%  | 60%  | 58%  | 58% | 56%  | 57%   | 57%  | 56%  |     |
| IGUV       |     |      |      |     |      |      |      |      |      |      |      | 61%  | 60%  | 63%  | 61%  | 59%  | 62%  | 58%       | 59%      | 58%      | 57%       | 57%       | 57%       | 57%       | 57%       | 57%       | 57%    | 57%       | 58%        | 58%  | 61%  | 56%  | 56% | 57%  | 56%   | 58%  |      |     |
| KOKV       |     |      |      |     |      |      |      |      |      |      |      |      | 60%  | 59%  | 61%  | 61%  | 62%  | 60%       | 59%      | 57%      | 57%       | 57%       | 57%       | 57%       | 57%       | 57%       | 58%    | 57%       | 57%        | 59%  | 57%  | 59%  | 60% | 57%  | 56%   | 57%  | 55%  |     |
| DEN2       |     |      |      |     |      |      |      |      |      |      |      |      | 70%  | 70%  | 68%  | 63%  | 58%  | 59%       | 57%      | 57%      | 57%       | 56%       | 57%       | 57%       | 57%       | 57%       | 57%    | 57%       | 59%        | 57%  | 59%  | 59%  | 57% | 58%  | 59%   | 58%  |      |     |
| DEN1       |     |      |      |     |      |      |      |      |      |      |      |      |      | 72%  | 69%  | 60%  | 59%  | 59%       | 60%      | 60%      | 60%       | 59%       | 60%       | 59%       | 60%       | 59%       | 60%    | 60%       | 59%        | 56%  | 58%  | 59%  | 57% | 57%  | 57%   | 57%  |      |     |
| DEN3       |     |      |      |     |      |      |      |      |      |      |      |      |      |      | 70%  | 59%  | 57%  | 58%       | 57%      | 56%      | 56%       | 56%       | 56%       | 56%       | 56%       | 56%       | 56%    | 57%       | 58%        | 57%  | 58%  | 60%  | 57% | 55%  | 57%   | 60%  |      |     |
| DEN4       |     |      |      |     |      |      |      |      |      |      |      |      |      |      |      |      | 61%  | 60%       | 60%      | 58%      | 58%       | 58%       | 58%       | 58%       | 58%       | 58%       | 58%    | 61%       | 57%        | 56%  | 59%  | 57%  | 58% | 58%  | 58%   | 54%  |      |     |
| ZIKV       |     |      |      |     |      |      |      |      |      |      |      |      |      |      |      |      |      | 58%       | 58%      | 56%      | 56%       | 56%       | 56%       | 56%       | 56%       | 56%       | 56%    | 56%       | 60%        | 58%  | 59%  | 59%  | 58% | 57%  | 58%   | 57%  |      |     |
| EHV P1553  |     |      |      |     |      |      |      |      |      |      |      |      |      |      |      |      |      |           | 99%      | 80%      | 80%       | 80%       | 80%       | 80%       | 80%       | 80%       | 80%    | 81%       | 80%        | 67%  | 68%  | 68%  | 65% | 63%  | 63%   | 57%  | 57%  |     |
| EHV V366   |     |      |      |     |      |      |      |      |      |      |      |      |      |      |      |      |      |           |          | 81%      | 81%       | 81%       | 81%       | 81%       | 81%       | 81%       | 81%    | 81%       | 81%        | 81%  | 81%  | 81%  | 81% | 81%  | 81%   | 81%  | 81%  |     |
| EHV C281   |     |      |      |     |      |      |      |      |      |      |      |      |      |      |      |      |      |           |          |          | 99%       | 99%       | 99%       | 99%       | 99%       | 99%       | 99%    | 99%       | 99%        | 99%  | 99%  | 99%  | 99% | 99%  | 99%   | 99%  | 99%  |     |
| EHV PH235  |     |      |      |     |      |      |      |      |      |      |      |      |      |      |      |      |      |           |          |          |           | 100%      | 98%       | 99%       | 99%       | 99%       | 99%    | 99%       | 99%        | 99%  | 99%  | 99%  | 99% | 99%  | 99%   | 99%  | 99%  |     |
| EHV 19542  |     |      |      |     |      |      |      |      |      |      |      |      |      |      |      |      |      |           |          |          |           |           | 98%       | 99%       | 99%       | 99%       | 99%    | 99%       | 99%        | 99%  | 99%  | 99%  | 99% | 99%  | 99%   | 99%  | 99%  | 99% |
| EHV 26314  |     |      |      |     |      |      |      |      |      |      |      |      |      |      |      |      |      |           |          |          |           |           | 98%       | 99%       | 99%       | 99%       | 99%    | 99%       | 99%        | 99%  | 99%  | 99%  | 99% | 99%  | 99%   | 99%  | 99%  | 99% |
| EHV 22441  |     |      |      |     |      |      |      |      |      |      |      |      |      |      |      |      |      |           |          |          |           |           |           | 99%       | 99%       | 99%       | 98%    | 98%       | 98%        | 98%  | 98%  | 98%  | 98% | 98%  | 98%   | 98%  | 98%  |     |
| EHV 22144  |     |      |      |     |      |      |      |      |      |      |      |      |      |      |      |      |      |           |          |          |           |           |           | 100%      | 100%      | 99%       | 99%    | 99%       | 99%        | 99%  | 99%  | 99%  | 99% | 99%  | 99%   | 99%  | 99%  | 99% |
| EHV 23562  |     |      |      |     |      |      |      |      |      |      |      |      |      |      |      |      |      |           |          |          |           |           |           |           | 100%      | 100%      | 99%    | 99%       | 99%        | 99%  | 99%  | 99%  | 99% | 99%  | 99%   | 99%  | 99%  | 99% |
| EHV SW     |     |      |      |     |      |      |      |      |      |      |      |      |      |      |      |      |      |           |          |          |           |           |           |           |           | 99%       | 100%   | 65%       | 67%        | 67%  | 63%  | 62%  | 63% | 61%  | 63%   | 57%  | 59%  |     |
| EHV 33029  |     |      |      |     |      |      |      |      |      |      |      |      |      |      |      |      |      |           |          |          |           |           |           |           |           |           | 99%    | 64%       | 66%        | 67%  | 63%  | 61%  | 63% | 63%  | 57%   | 59%  |      |     |
| EHV GU0068 |     |      |      |     |      |      |      |      |      |      |      |      |      |      |      |      |      |           |          |          |           |           |           |           |           |           |        | 99%       | 64%        | 67%  | 67%  | 63%  | 62% | 63%  | 57%   | 59%  |      |     |
| JUGV       |     |      |      |     |      |      |      |      |      |      |      |      |      |      |      |      |      |           |          |          |           |           |           |           |           |           |        |           |            | 70%  | 71%  | 64%  | 61% | 64%  | 62%   | 56%  |      |     |
| UGSV       |     |      |      |     |      |      |      |      |      |      |      |      |      |      |      |      |      |           |          |          |           |           |           |           |           |           |        |           |            |      | 76%  | 64%  | 60% | 61%  | 58%   | 58%  |      |     |
| BANV       |     |      |      |     |      |      |      |      |      |      |      |      |      |      |      |      |      |           |          |          |           |           |           |           |           |           |        |           |            |      |      | 64%  | 61% | 64%  | 62%   | 58%  |      |     |
| YFV        |     |      |      |     |      |      |      |      |      |      |      |      |      |      |      |      |      |           |          |          |           |           |           |           |           |           |        |           |            |      |      |      | 68% | 67%  | 63%   | 60%  |      |     |
| SEPV       |     |      |      |     |      |      |      |      |      |      |      |      |      |      |      |      |      |           |          |          |           |           |           |           |           |           |        |           |            |      |      |      |     | 73%  | 60%   | 57%  |      |     |
| WESSV      |     |      |      |     |      |      |      |      |      |      |      |      |      |      |      |      |      |           |          |          |           |           |           |           |           |           |        |           |            |      |      |      |     |      | 73%   | 60%  | 57%  |     |
| YOKV       |     |      |      |     |      |      |      |      |      |      |      |      |      |      |      |      |      |           |          |          |           |           |           |           |           |           |        |           |            |      |      |      |     |      |       | 62%  | 58%  |     |
